# Supplementary material for: Glutathione-dependent redox balance characterizes the distinct metabolic properties of follicular and marginal zone B cells
Source: PubMed Central journal article supplement (PMC8980022; doi:10.1038/s41467-022-29426-x), 2022-04-04
Supplement: 41467_2022_29426_MOESM7_ESM.pdf [file 41467_2022_29426_MOESM7_ESM.pdf]

## Reporting Summary

Nature Portfolio wishes to improve the reproducibility of the work that we publish. This form provides structure for consistency and transparency in reporting. For further information on Nature Portfolio policies, see our [Editorial Policies](#) and the [Editorial Policy Checklist](#).

### Statistics

For all statistical analyses, confirm that the following items are present in the figure legend, table legend, main text, or Methods section.

n/a Confirmed

- The exact sample size ( $n$ ) for each experimental group/condition, given as a discrete number and unit of measurement
- A statement on whether measurements were taken from distinct samples or whether the same sample was measured repeatedly
- The statistical test(s) used AND whether they are one- or two-sided  
*Only common tests should be described solely by name; describe more complex techniques in the Methods section.*
- A description of all covariates tested
- A description of any assumptions or corrections, such as tests of normality and adjustment for multiple comparisons
- A full description of the statistical parameters including central tendency (e.g. means) or other basic estimates (e.g. regression coefficient) AND variation (e.g. standard deviation) or associated estimates of uncertainty (e.g. confidence intervals)
- For null hypothesis testing, the test statistic (e.g.  $F$ ,  $t$ ,  $r$ ) with confidence intervals, effect sizes, degrees of freedom and  $P$  value noted  
*Give  $P$  values as exact values whenever suitable.*
- For Bayesian analysis, information on the choice of priors and Markov chain Monte Carlo settings
- For hierarchical and complex designs, identification of the appropriate level for tests and full reporting of outcomes
- Estimates of effect sizes (e.g. Cohen's  $d$ , Pearson's  $r$ ), indicating how they were calculated

*Our web collection on [statistics for biologists](#) contains articles on many of the points above.*

### Software and code

Policy information about [availability of computer code](#)

Data collection

Data analysis

For manuscripts utilizing custom algorithms or software that are central to the research but not yet described in published literature, software must be made available to editors and reviewers. We strongly encourage code deposition in a community repository (e.g. GitHub). See the Nature Portfolio [guidelines for submitting code & software](#) for further information.

### Data

Policy information about [availability of data](#)

All manuscripts must include a [data availability statement](#). This statement should provide the following information, where applicable:

- Accession codes, unique identifiers, or web links for publicly available datasets
- A description of any restrictions on data availability
- For clinical datasets or third party data, please ensure that the statement adheres to our [policy](#)

The statement is included in the manuscript. The CITE-seq data from control and Gclc-deficient B cells have been deposited in GEO under the GSE194419; <https://www.ncbi.nlm.nih.gov/geo/query/acc.cgi?acc=GSE194419>.

## Field-specific reporting

Please select the one below that is the best fit for your research. If you are not sure, read the appropriate sections before making your selection.

Life sciences  Behavioural & social sciences  Ecological, evolutionary & environmental sciences

For a reference copy of the document with all sections, see [nature.com/documents/nr-reporting-summary-flat.pdf](https://www.nature.com/documents/nr-reporting-summary-flat.pdf)

## Life sciences study design

All studies must disclose on these points even when the disclosure is negative.

|                 |                                                                                                                                                                                                                                                                                      |
|-----------------|--------------------------------------------------------------------------------------------------------------------------------------------------------------------------------------------------------------------------------------------------------------------------------------|
| Sample size     | Samples sizes were calculated based on power calculations. The Competence Center for Methodology and Statistics (CCMS) at the Luxembourg Institute of Health estimated an effect size ranging from 1 to 2.25, which will give a minimum power of 90% for the individual experiments. |
| Data exclusions | No data was excluded                                                                                                                                                                                                                                                                 |
| Replication     | 2-5 (indicated in the figure legends)                                                                                                                                                                                                                                                |
| Randomization   | We used aged matched animals from littermates. Material and Methods: Animals. No randomization was used.                                                                                                                                                                             |
| Blinding        | Animal experiments were performed blinded.                                                                                                                                                                                                                                           |

## Reporting for specific materials, systems and methods

We require information from authors about some types of materials, experimental systems and methods used in many studies. Here, indicate whether each material, system or method listed is relevant to your study. If you are not sure if a list item applies to your research, read the appropriate section before selecting a response.

### Materials & experimental systems

| n/a                                 | Involved in the study                                           |
|-------------------------------------|-----------------------------------------------------------------|
| <input type="checkbox"/>            | <input checked="" type="checkbox"/> Antibodies                  |
| <input checked="" type="checkbox"/> | <input type="checkbox"/> Eukaryotic cell lines                  |
| <input checked="" type="checkbox"/> | <input type="checkbox"/> Palaeontology and archaeology          |
| <input type="checkbox"/>            | <input checked="" type="checkbox"/> Animals and other organisms |
| <input checked="" type="checkbox"/> | <input type="checkbox"/> Human research participants            |
| <input checked="" type="checkbox"/> | <input type="checkbox"/> Clinical data                          |
| <input checked="" type="checkbox"/> | <input type="checkbox"/> Dual use research of concern           |

### Methods

| n/a                                 | Involved in the study                              |
|-------------------------------------|----------------------------------------------------|
| <input checked="" type="checkbox"/> | <input type="checkbox"/> ChIP-seq                  |
| <input type="checkbox"/>            | <input checked="" type="checkbox"/> Flow cytometry |
| <input checked="" type="checkbox"/> | <input type="checkbox"/> MRI-based neuroimaging    |

## Antibodies

|                 |                                                                                                                                                                                                                                                                                                                                                                                                                                                                                                                                                                                                                                                                                                                                                                                                                                        |
|-----------------|----------------------------------------------------------------------------------------------------------------------------------------------------------------------------------------------------------------------------------------------------------------------------------------------------------------------------------------------------------------------------------------------------------------------------------------------------------------------------------------------------------------------------------------------------------------------------------------------------------------------------------------------------------------------------------------------------------------------------------------------------------------------------------------------------------------------------------------|
| Antibodies used | Antigen Fluorochrome Supplier (cat. number) Clone<br><br>CD11b Pacific Blue BioLegend (101224) M1/70<br>CD19 FITC BD (557398) 1D3<br>CD19 BV785 BioLegend (115543) 6D5<br>CD1d Pacific Blue BioLegend (123517) 1B1<br>CD21/CD35 FITC BioLegend (123408) 7,00E+09<br>CD21/CD35 APC BioLegend (123411) 7,00E+09<br>CD23 PE BioLegend (101608) B3B4<br>CD23 Pacific Blue BioLegend (101615) B3B4<br>CD24 APC Fisher Scientific (17-0242-82) M1/69<br>CD35 BUV737 BD (741751) 8C12<br>CD45R/B220 PE Immunostep (MO45RPE(V100)) RA3-6B2<br>CD93 BUV395 BD (740275) AA4.1<br>CD95 BV421 BD (562633) Jo2<br>GL-7 AF647 BioLegend (144606) GL7<br>IgD BV605 BD (63003) 11-26C.1<br>IgM PE/Cy7 BioLegend (406514) RMM-1<br>TCR beta APC Fisher Scientific (15380800) H57-597<br>IgM BUV395 BD (566217) R6-60.2<br>CD93 BUV737 BD (741800) AA4.1 |
|-----------------|----------------------------------------------------------------------------------------------------------------------------------------------------------------------------------------------------------------------------------------------------------------------------------------------------------------------------------------------------------------------------------------------------------------------------------------------------------------------------------------------------------------------------------------------------------------------------------------------------------------------------------------------------------------------------------------------------------------------------------------------------------------------------------------------------------------------------------------|

ICAM-1 APC Miltenyi Biotec (130-104-248) REA171  
VCAM-1 PE Fisher Scientific (15586846) 429

Validation

Antibodies were validated using FMO controls. In addition the selection of antibodies was based on clones that are well known in the field.

## Animals and other organisms

Policy information about [studies involving animals](#); [ARRIVE guidelines](#) recommended for reporting animal research

Laboratory animals

species: mus musculus, strains: C57BL/6, Gclc fl/fl (Chen et al. 2007 doi.org/10.1002/hep.21635), B6.C(Cg)-Cd79atm1(cre)Reth/EhobJ (Mb1-Cre). This study involved male and female mice at an age of 7-12 weeks. Age- and sex-matched mice were used for all experiments. The mice were housed and bred under specific pathogen-free (SPF) conditions at the Luxembourg Institute of Health (LIH) and the BTA facility of the University of Luxembourg.

Wild animals

The study did not involve wild animals.

Field-collected samples

The study did not involve samples collected from the field.

Ethics oversight

Luxembourg Institute of Health's Animal Welfare Structure (AWS).

Note that full information on the approval of the study protocol must also be provided in the manuscript.

## Flow Cytometry

### Plots

Confirm that:

- The axis labels state the marker and fluorochrome used (e.g. CD4-FITC).
- The axis scales are clearly visible. Include numbers along axes only for bottom left plot of group (a 'group' is an analysis of identical markers).
- All plots are contour plots with outliers or pseudocolor plots.
- A numerical value for number of cells or percentage (with statistics) is provided.

### Methodology

Sample preparation

For surface staining cells were incubated at 4°-8°C, in the dark with fluorochrome-conjugated CD19, CD23, CD21-CD35 or CD35, IgD, IgM, CD1d, CD24, CD93, CD95, GL-7. The antibody mix was washed from the cells after 20-30min. Samples from in vivo LCMV experiments were fixed for 10min at RT in a volume of at least 100µL 2% formaldehyde (FA) after staining.

Instrument

BD Fortessa, Novocyte Quanteon

Software

FlowJo 10.6.1

Cell population abundance

FoB: 70-80%  
MZB: 5-10%  
Purity > 90%

Gating strategy

FSC, SSC, doublet exclusion + live cell staining

- Tick this box to confirm that a figure exemplifying the gating strategy is provided in the Supplementary Information.
